# Supplementary material for: Roles of NIA/NR/NOA1-dependent nitric oxide production and HY1 expression in the modulation of Arabidopsis salt tolerance
Source: PubMed Central journal article supplement — J Exp Bot. 2013 Jun 6;64(10):3045–60. doi: 10.1093/jxb/ert149 (PMC3741688; doi:10.1093/jxb/ert149), 2013-06-06
Supplement: supp_ert149_jexbot099358_file001.pdf [file supp_ert149_jexbot099358_file001.pdf]

## Supplementary data

**Figure S1**

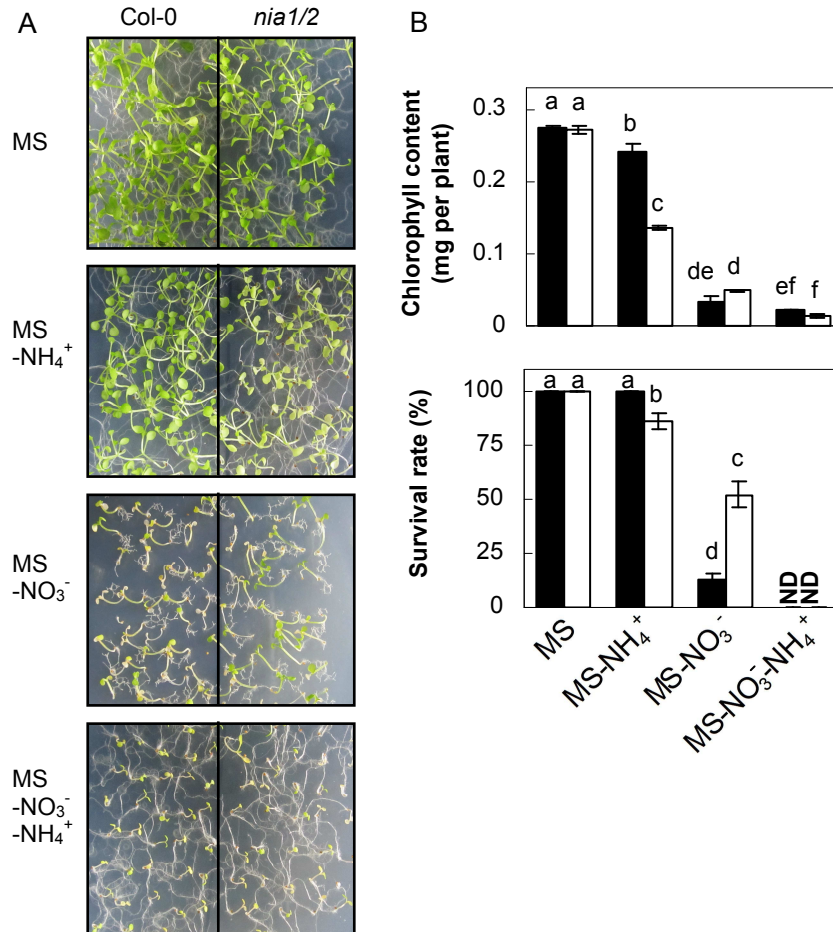

**Figure. S1** Morphology (A), chlorophyll content and survival rate (B) of stratified seeds of wild-type (Col-0) and *nia1/2* grown in the MS medium with or without nitrate and ammonium as indicated for 20 d. Data are means  $\pm$  SE from three independent experiments. Bars with different letters are significantly different at the  $P < 0.05$  level according to multiple comparison.

**Figure S2**

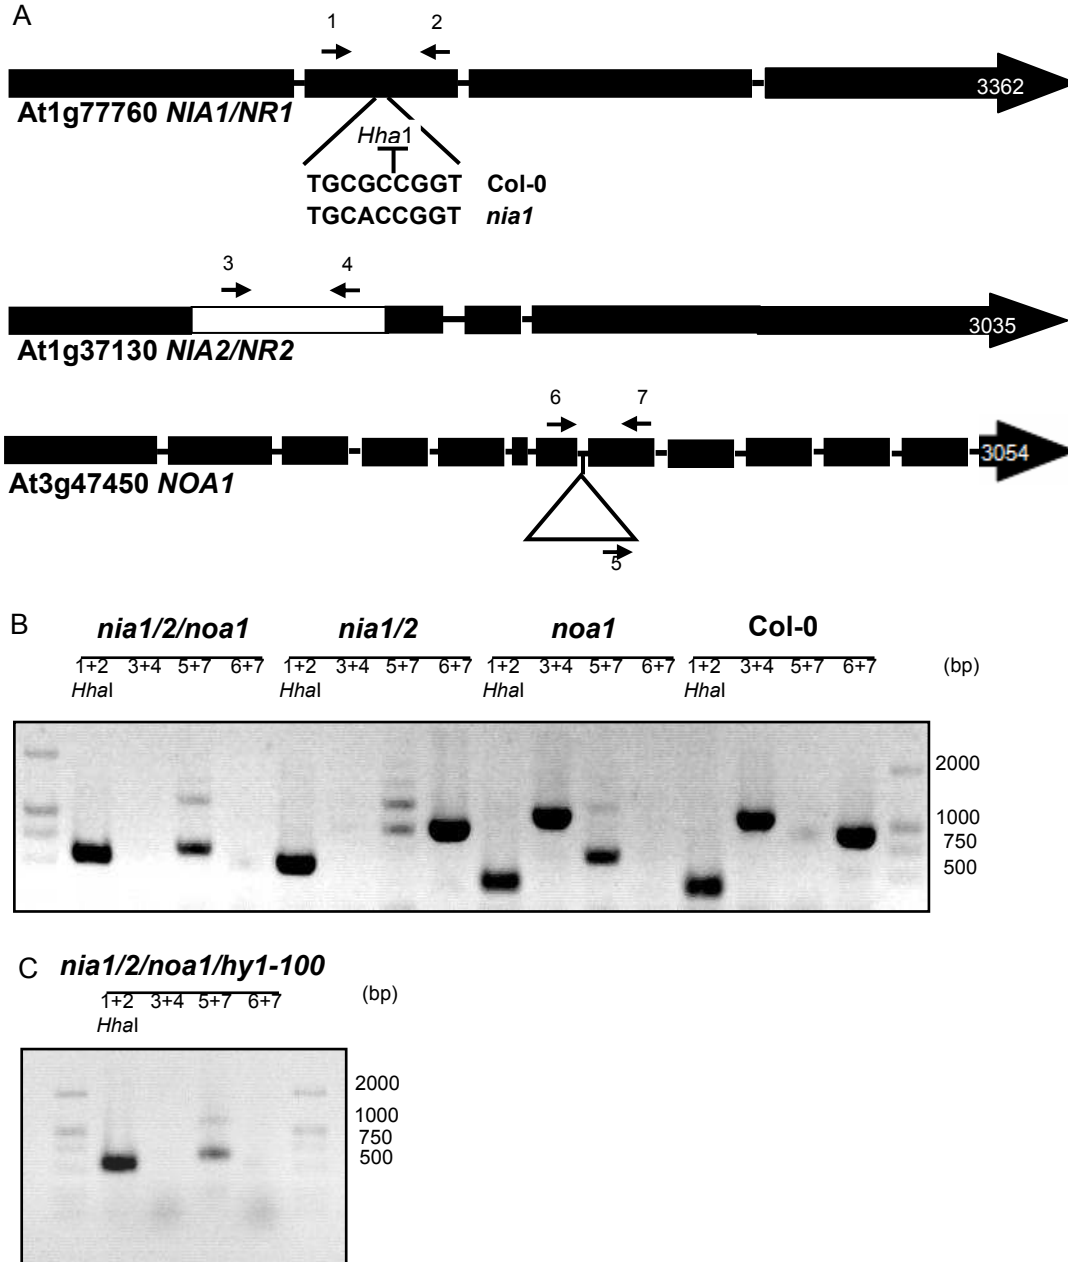

**Figure S2.** Genotyping of the generated *nia1/2/noa1* and *nia1/2/noa1/hy1-100* mutant. The position of the T-DNA insertion and primers (indicated with arrows and numbers) used for genotyping (Supplementary Table S1 at *JXB* online) mutations in the corresponding genes were shown in (A). The *HhaI* restriction site for genotyping of *nia1* mutations is also shown. PCR-based genotyping of wild-type, *noa1*, *nia1/2*, *nia1/2/noa1*,

and *nia1/2/noa1/hy1-100* mutant plants (B, C). The DNA of each genotypes was extracted and PCR-amplified using primer pairs 1+2, 3+4, 5+7, or 6+7, respectively.

**Figure S3**

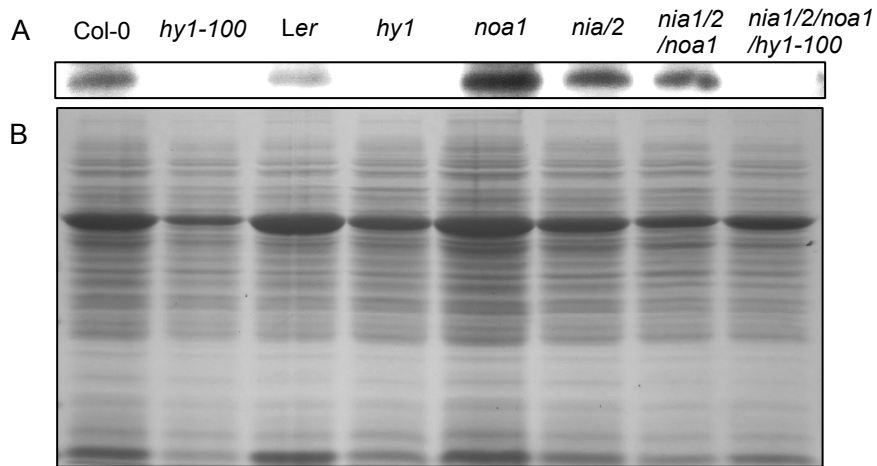

**Figure S3.** Detection of the HY1 protein level (A) in 5-d-old seedlings of Col-0, *hyl-100*, Ler, *hyl*, *noa1*, *nia1/2*, *nia1/2/noa1*, *nia1/2/noa1/hyl-100* by western-blot analysis. Coomassie Brilliant Blue-stained gels (B) are present to show that equal amounts of proteins were loaded.

**Figure S4**

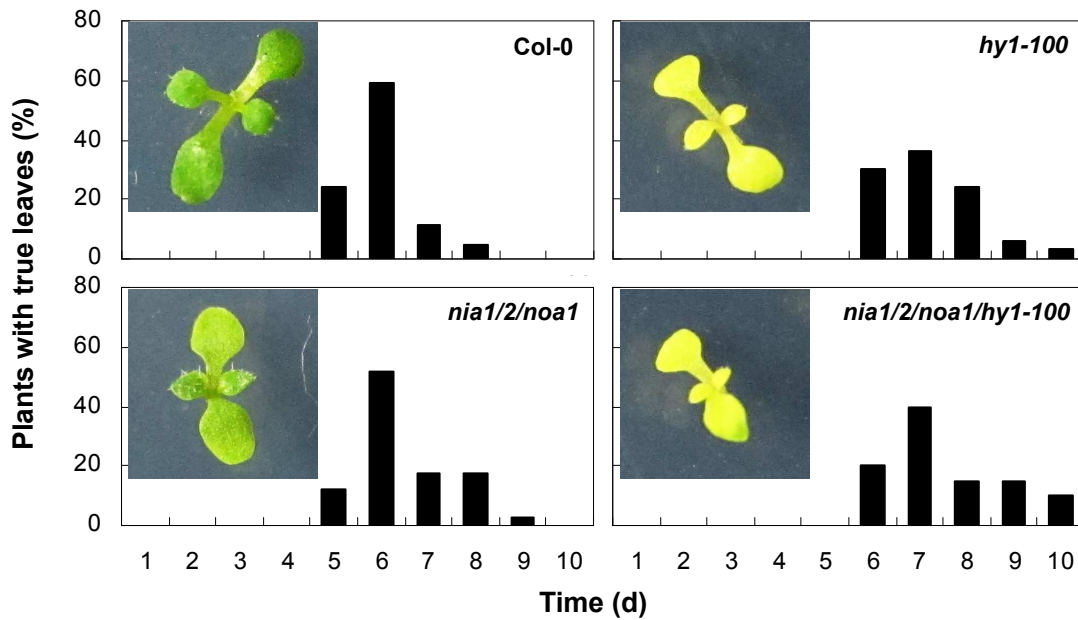

**Figure S4.** Developmental phenotypes of wild-type, *hy1-100*, *nia1/2/nea1*, and *nia1/2/nea1/hy1-100* plants at the early seedling stage. The percentage of seedlings from the indicated genotypes displaying their first pair of true leaves were scored daily from day 1 to 10 after sowing ( $n = 200$ ). Growth phenotypes of corresponding plants grown for 8 d were also shown.

Figure S5

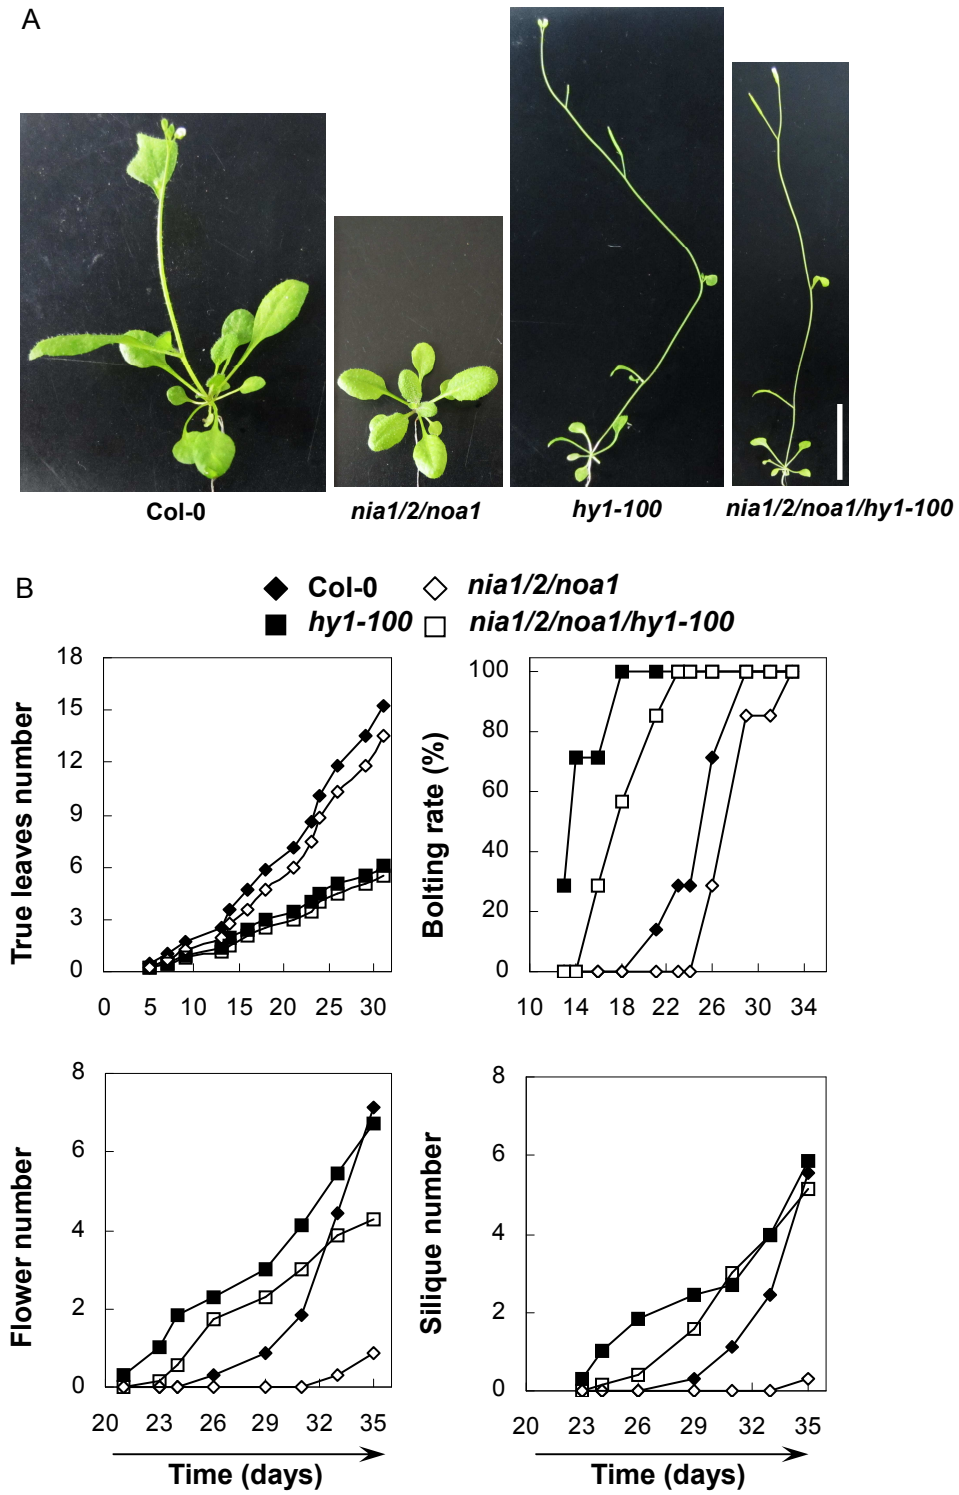

Figure S5. Developmental phenotypes of wild-type, *nia1/2/nao1*, *hy1-100*, and *nia1/2/nao1/hy1-100* plants at the vegetative and reproductive growth stages. Morphology

of indicated genotypes grown for 24 d in the soil under long-day conditions (A). Bar = 2 cm. Time course analysis of true leaves number, bolting rate, flower and silique numbers of corresponding genotypes ( $n = 30$ ; B).

**Figure S6**

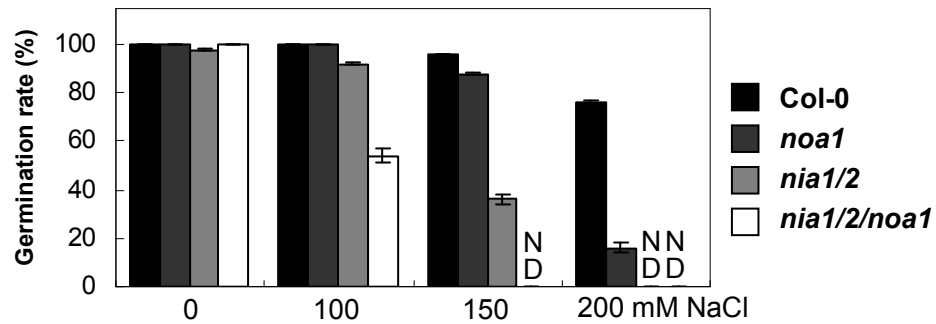

**Figure S6.** Dose-dependent inhibition of seed germination in wild-type (Col-0), *noa1*, *nia1/2*, and *nia1/2/noa1* induced by increasing NaCl concentrations for 8 d ( $n = 100$ ). ND: none detected.



**Figure S7**

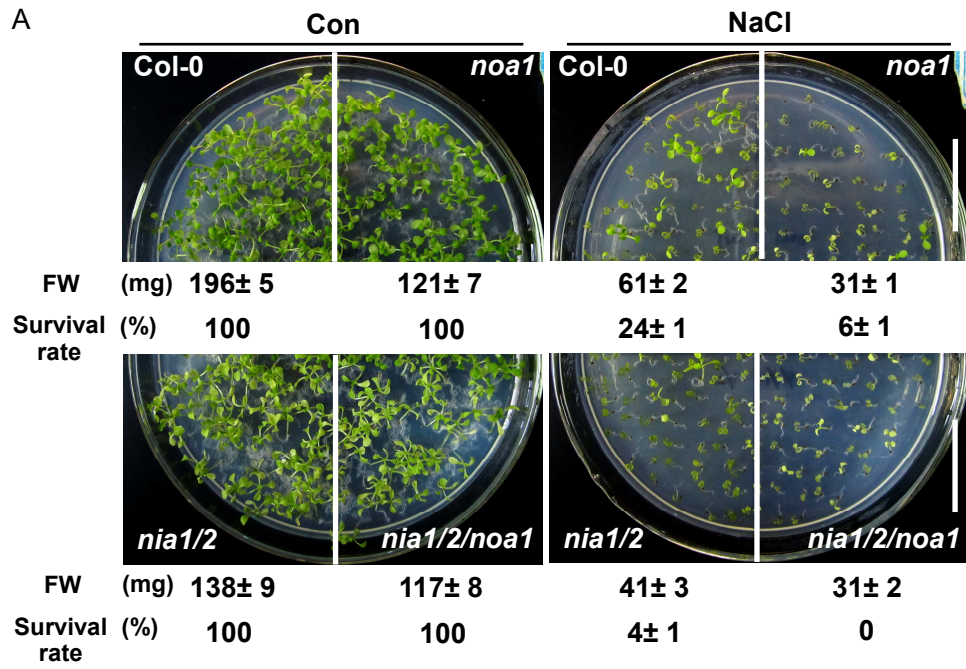

**Figure S7.** Fresh weight and survival rate of stratified seeds of wild-type (Col-0), *noa1*, *nia1/2*, and *nia1/2/noa1* with or without 150 mM NaCl treatment for 20 d. Bar = 2 cm.

**Figure S8**

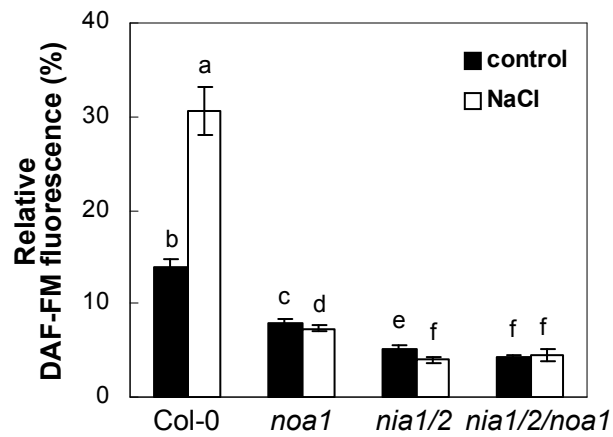

**Figure S8.** DAF-FM-associated fluorescence in seedling roots of Col-0, *noa1*, *nia1/2*, and *nia1/2/noa1*. 5-d-old seedlings of each ecotype were treated with or without 150 mM NaCl for 1 hr. Then, the DAF-FM fluorescence in seedling roots was detected by LSCM, and means of corresponding intensity were calculated by Leica software. Data are means  $\pm$  SE from three independent experiments. Mean values were compared by a multiple comparison on the basis of the nested ANOVA, with genotypes nested within different treatments [model: phenotypic indicators = replication + treatment + sample (treatment)]. Mean values with different letters denote a significant difference according to multiple comparison ( $P < 0.05$ ).

**Figure S9**

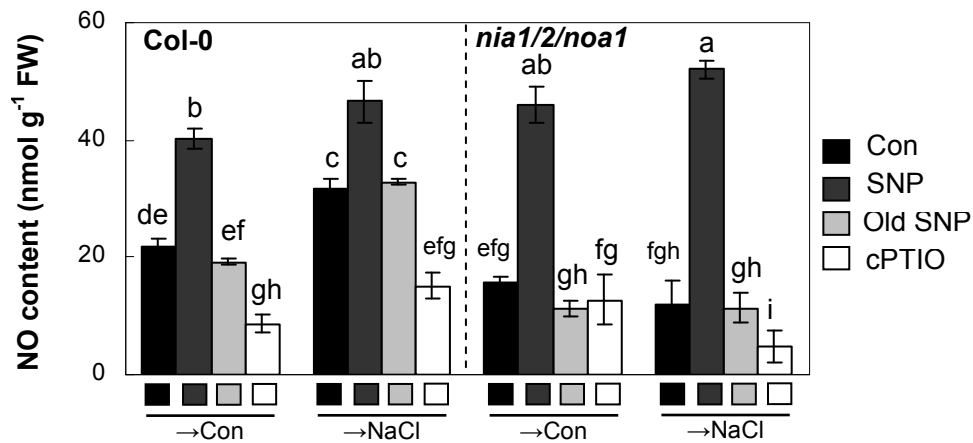

**Figure. S9.** Determination of NO content in Col-0 and *nia1/2/noa1* seedlings by Griess reagent assay. After pre-incubation in the absence or presence of 10  $\mu$ M SNP, 10  $\mu$ M Old SNP, or 400  $\mu$ M cPTIO for 1 hr, 5-d-old seedlings of wild-type and *nia1/2/noa1* mutant were treated with or without 150 mM NaCl for another 1 hr. NO contents of seedlings were then detected by using Griess reagent. Samples pretreated with 1 mM cPTIO, the scavenger of NO for 30 min, were used as blanks. Data are means  $\pm$  SE from three independent experiments. Mean values were compared by a multiple comparison on the basis of the nested ANOVA, with genotypes nested within different treatments [model: phenotypic indicators = replication + treatment + sample (treatment)]. Mean values with different letters denote a significant difference according to multiple comparison ( $P < 0.05$ ).

**Figure S10**

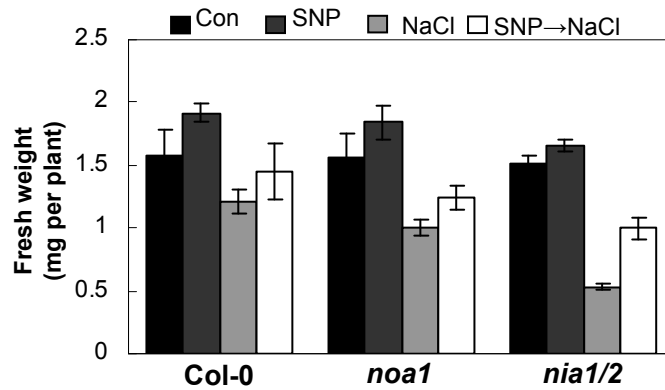

**Figure S10.** Effects of SNP on growth of Col-0, *noa1*, and *nia1/2* mutant plants. Plant seedlings were grown in the absence of NaCl or after 150 mM NaCl treatment for 7 d preceded by pretreatment for 5 d with or without 1.0  $\mu$ M SNP. Corresponding fresh weight were then measured. Data are means  $\pm$  SE from three independent experiments.

**Figure S11**

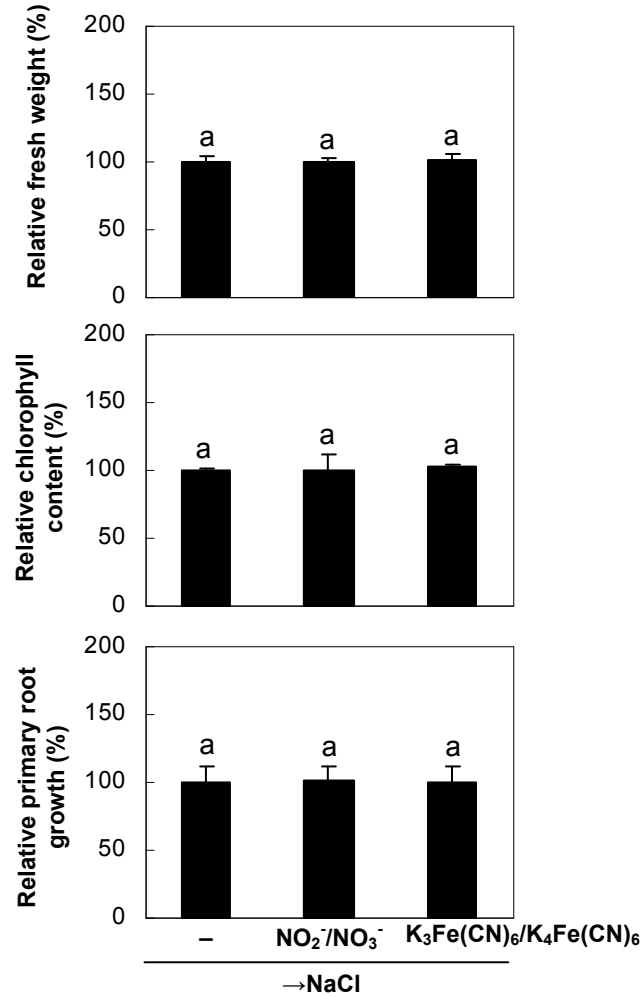

**Figure S11.** Effects of NO<sub>2</sub><sup>-</sup>/NO<sub>3</sub><sup>-</sup>, K<sub>3</sub>Fe(CN)<sub>6</sub>/K<sub>4</sub>Fe(CN)<sub>6</sub> and NaCl on growth of Col-0 seedlings. Plants were exposed with 150 mM NaCl for 7 d preceded by pretreatment for 5 d with or without 1.0 μM/1.0 μM NO<sub>2</sub><sup>-</sup>/NO<sub>3</sub><sup>-</sup>, or 1.0 μM/1.0 μM K<sub>3</sub>Fe(CN)<sub>6</sub>/K<sub>4</sub>Fe(CN)<sub>6</sub>. Relative fresh weight, chlorophyll content, and primary root growth were then measured, taking 150 mM NaCl stressed alone samples as 100%. Data are means ± SE from three independent experiments. Bars with different letters are significantly different compared with NaCl stressed alone samples at the  $P < 0.05$  level according to multiple comparison.

**Figure S12**

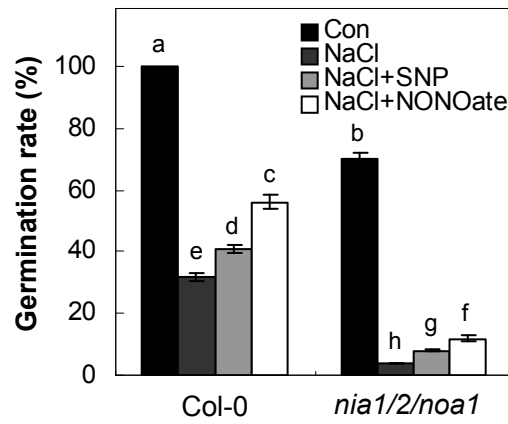

**Figure S12.** Germination rate of wild-type (Col-0) and *nia1/2/noa1* mutant seeds in the absence or presence of 150 mM NaCl with or without 1  $\mu$ M SNP or 1  $\mu$ M NONOate for 3 d. Data are means  $\pm$  SE from three independent experiments with at least 100 seeds per experiment. Mean values were compared by a multiple comparison on the basis of the nested ANOVA, with genotypes nested within different treatments [model: phenotypic indicators = replication + treatment + sample (treatment)]. Mean values with different letters denote a significant difference according to multiple comparison ( $P < 0.05$ ).

**Figure S13**

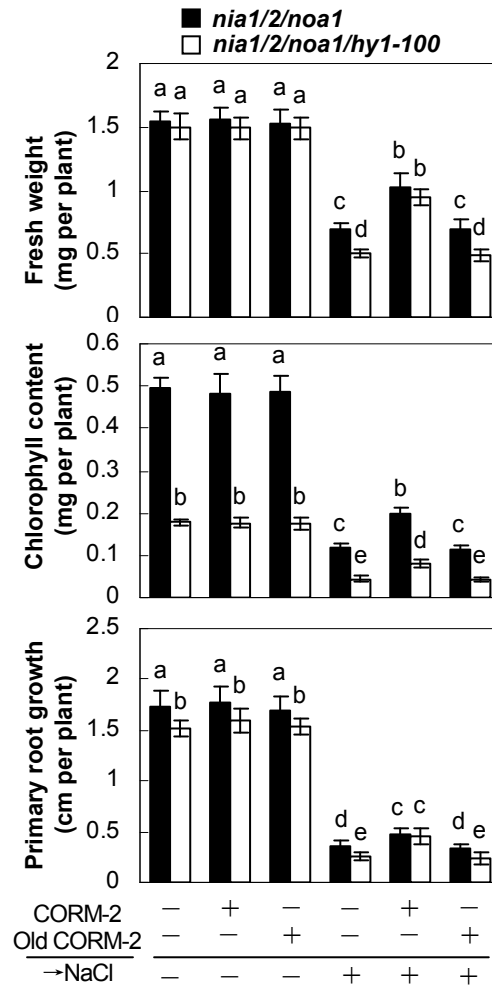

**Figure S13.** Effects of CORM-2 and Old CORM-2 on salt hypersensitivity phenotype of *nia1/2/nao1* and *nia1/2/nao1/hy1-100* mutant plants. Mutant plants were grown in the absence of NaCl or after 150 mM NaCl treatment for 7 d preceded by pretreatment for 5 d with or without 0.1  $\mu$ M CORM-2 or 0.1  $\mu$ M Old CORM-2. Corresponding fresh weight, chlorophyll content, and primary root growth were then measured. The Old CORM-2 were obtained as the negative controls. Data are means  $\pm$  SE from three independent experiments. Mean values were compared by a multiple comparison on the basis of the nested ANOVA, with genotypes nested within different treatments [model: phenotypic indicators = replication + treatment + sample (treatment)]. Mean values with different letters denote a significant difference according to multiple comparison ( $P < 0.05$ ).

**Figure S14**

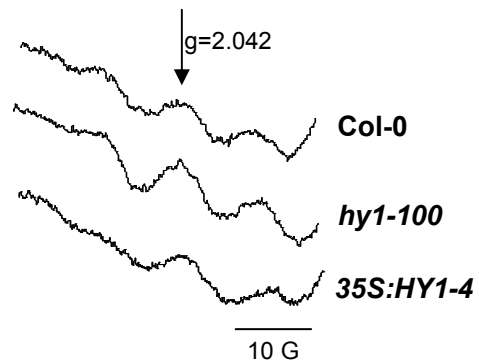

**Figure. S14.** Determination of NO content in Col-0, *hy1-100*, and *35S:HY1-4* seedlings by Electron Paramagnetic Resonance (EPR). 5-d-old seedlings of wild-type and mutants were treated with 150 mM NaCl for 1 hr, and then NO contents of seedlings were detected by EPR. The signals were recorded at the identical EPR settings.



**Figure S15**

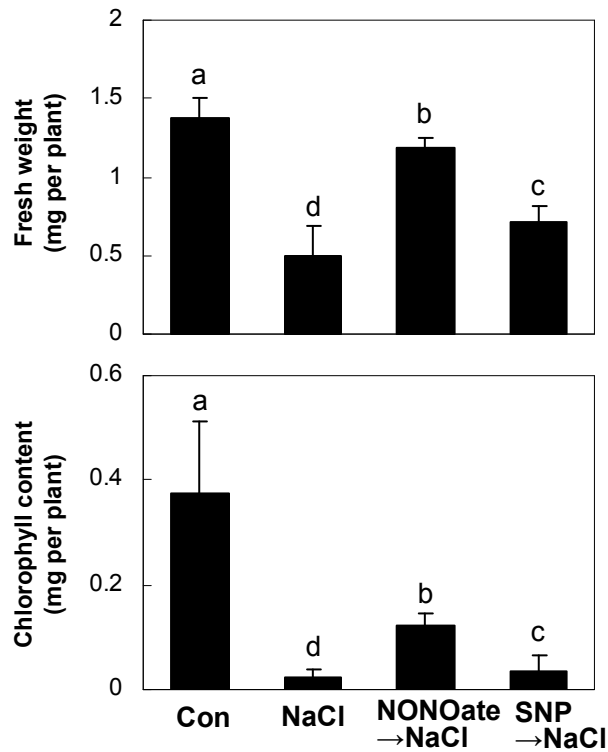

**Figure S15.** Effects of NONOate and SNP on growth and chlorophyll contents of *hy1* mutant plants. Mutant plants were grown in the absence of NaCl or after 150 mM NaCl treatment for 7 d preceded by pretreatment for 5 d with or without 1.0  $\mu$ M NONOate or 1.0  $\mu$ M SNP. Corresponding fresh weight and chlorophyll content were then measured. Data are means  $\pm$  SE from three independent experiments. Mean values with different letters denote a significant difference according to multiple comparison ( $P < 0.05$ ).

**Figure S16**

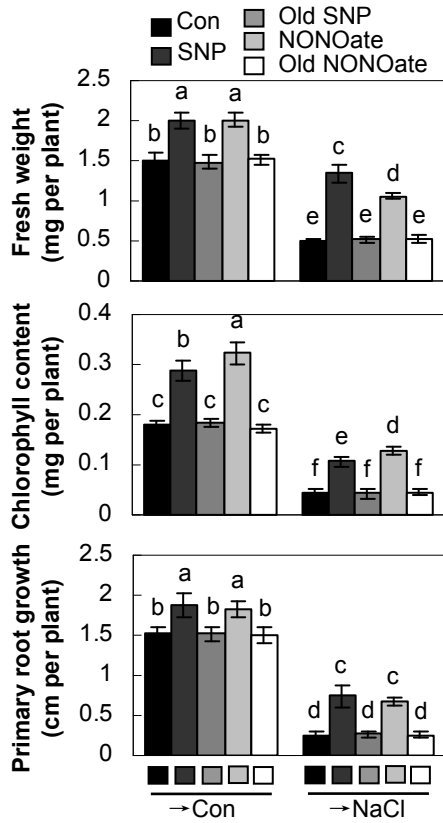

**Figure S16.** Effects of fresh and old NO-releasing compounds on salt hypersensitivity phenotype of *nial2/noal/hyl-100* mutant plants. Mutant plants were grown in the absence of NaCl or after 150 mM NaCl treatment for 7 d preceded by pretreatment for 5 d with or without 1.0  $\mu$ M SNP, 1.0  $\mu$ M Old SNP, 1.0  $\mu$ M NONOate, or 1.0  $\mu$ M Old NONOate. Corresponding fresh weight, chlorophyll content, and primary root growth were then measured. The Old SNP/Old NONOate was obtained as the negative controls. Data are means  $\pm$  SE from three independent experiments. Mean values with different letters denote a significant difference according to multiple comparison ( $P < 0.05$ ).

**Supplementary Table 1.** The sequences of PCR primers for genotyping.

| Primer name    | Sequences (5'→3')     |
|----------------|-----------------------|
| <i>NOA1-LP</i> | GCACCTACACCACAGGCAAGC |
| <i>NOA1-RP</i> | CCAATTGGCAATGTTGGTCG  |
| <i>NIA1-LP</i> | TACGACGACTCCTCAAGCGAC |
| <i>NIA1-RP</i> | GGCTATAGATCCCGCATCGAC |
| <i>NIA2-LP</i> | ACGGCGTGGTTCGTTCTTACA |
| <i>NIA2-RP</i> | ACCTTCTTCGTCGGCGAGTTC |
| <i>LBb1.3</i>  | ATTTTGCCGATTCGGAAC    |

**Supplementary Table 2.** The sequences of PCR primers for real-time RT-PCR.

| Locus     | Primer name       | Sequences (5'→3')          |
|-----------|-------------------|----------------------------|
| At2g26670 | <i>HY1-F</i>      | CGTCCTGTTGCTAAATG          |
|           | <i>HY1-R</i>      | TTCCAGCCCCGTGTTCT          |
| At1g69720 | <i>HO-3-F</i>     | CCACTTTCCAGCGAGCACA        |
|           | <i>HO-3-R</i>     | ATAGCCGCCGCAGTCAC          |
| At1g58300 | <i>HO-4-F</i>     | TCTTGCCGCTTTCCTGC          |
|           | <i>HO-4-R</i>     | GCTGCTGCCACAACATTC         |
| At5g52310 | <i>RD29A-F</i>    | ATCACTTGGCTCCACTGTTGTTC    |
|           | <i>RD29A-R</i>    | ACAAAACACACATAAACATCCAAAGT |
| At5g66400 | <i>RAB18-F</i>    | AAGAAGAACATGGCGTCTTACCA    |
|           | <i>RAB18-R</i>    | TGCTGCTGGATCGGGTTT         |
| At1g27730 | <i>ZAT10-F</i>    | AGGCTCTTACATCACCAAGATTAG   |
|           | <i>ZAT10-R</i>    | TACTTGTAGCTCAACTTCTCCA     |
| At5g59820 | <i>ZAT12-F</i>    | TGTCCCATATGTGGAGTGGA       |
|           | <i>ZAT12-R</i>    | ATTGTCCACCATCCCTAGACT      |
| At2g43350 | <i>GPX3-F</i>     | CATCACCTCTTGAAATTGAGAAGGA  |
|           | <i>GPX3-R</i>     | CAGACATGTTTGATGCGATGC      |
| At1g07890 | <i>cAPX1-F</i>    | ACTCTGGGACGATGCCACAAG      |
|           | <i>cAPX1-R</i>    | TCTCGACCAAAGGACGGAAAA      |
| At3g09640 | <i>cAPX2-F</i>    | TGGTCGGATGGGACTCAAT        |
|           | <i>cAPX2-R</i>    | AAGAGCCTTGTCGGTTGGT        |
| At4g25100 | <i>FSD1-F</i>     | GCTCGGCTCTTCCCATTGC        |
|           | <i>FSD1-R</i>     | CAGCTTCCCAAGACACAAGATTGG   |
| At3g18780 | <i>actin2/7-F</i> | TCGTTTCGCTTTCCTTAG         |
|           | <i>actin2/7-R</i> | CTTACCATTCCAGTTCC          |

**Supplementary Table 3.** Comparative analysis of seedling growth inhibition of wild-type, *hyl-100*, *nia1/2/noa1*, and *nia1/2/noa1/hyl-100* mutants grown upon 150 mM NaCl stress for 7 d. Data are means  $\pm$  SE from three independent experiments. Different letters within columns indicate significant differences at the  $P < 0.05$  level according to multiple comparison.

| Genotype                   | Primary root growth<br>(cm per plant) | Fresh weight (mg per plant)  |
|----------------------------|---------------------------------------|------------------------------|
| Col-0                      | 0.85 $\pm$ 0.13 <sup>a</sup>          | 1.29 $\pm$ 0.14 <sup>a</sup> |
| <i>hyl-100</i>             | 0.46 $\pm$ 0.09 <sup>b</sup>          | 1.07 $\pm$ 0.07 <sup>b</sup> |
| <i>nia1/2/noa1</i>         | 0.35 $\pm$ 0.07 <sup>c</sup>          | 0.70 $\pm$ 0.04 <sup>c</sup> |
| <i>nia1/2/noa1/hyl-100</i> | 0.26 $\pm$ 0.04 <sup>d</sup>          | 0.50 $\pm$ 0.04 <sup>d</sup> |

## Methods for supplementary data

### *Chemicals*

$\text{NO}_2^-/\text{NO}_3^-$  and  $\text{K}_3\text{Fe}(\text{CN})_6/\text{K}_4\text{Fe}(\text{CN})_6$  were used as the negative controls of SNP treatment (Ederli et al., 2006; Shi et al., 2007; Xie et al., 2008). The concentrations of above compounds used in this study were determined in pilot experiments from which maximal induced responses were obtained.

### *Survival rate analysis*

After germination, survival rates of Arabidopsis seedlings were measured according to the method described by Zhao et al. (2007).

### *NO detection by Griess reagent*

NO production was determined using the Griess reagent as described (Xie et al., 2008; Xuan et al., 2012). Meanwhile, samples of various treatments, which were preincubated with 1 mM cPTIO for 30 min, were regarded as the blank to avoid the interference of nitrite. Absorbance was assayed at 540 nm, NO content was calculated by comparison to a standard curve of  $\text{NaNO}_2$ .

### *Western-blot analysis for HY1*

Arabidopsis seedlings were collected for western-blot analysis of HY1. The primary antibody used was rabbit polyclonal antibody raised against the recombinant mature HY1 protein with a molecular mass of 26.6 kDa (Xie et al., 2011). Immune complexes were detected using horseradish peroxidase (HRP)-conjugated goat anti-rabbit IgG. The color was developed with a solution containing DAB as the HRP substrate.

## References for Supplementary data

- Ederli L, Morettini R, Borgogni A, Wasternack C, Miersch O, Reale L, Ferranti F, Tosti N, Pasqualini S.** 2006. Interaction between nitric oxide and ethylene in the induction of alternative oxidase in ozone-treated tobacco plants. *Plant Physiology* **142**, 595–608.
- Shi Q, Ding F, Wang X, Wei M.** 2007. Exogenous nitric oxide protect cucumber roots against oxidative stress induced by salt stress. *Plant Physiology and Biochemistry* **45**, 542–550.
- Xie YJ, Ling TF, Han Y, Liu KL, Zheng QS, Huang LQ, Yuan XX, He ZY, Hu B, Fang L, Shen ZG, Yang Q, Shen WB.** 2008. Carbon monoxide enhances salt tolerance by nitric oxide-mediated maintenance of ion homeostasis and up-regulation of antioxidant defence in wheat seedling roots. *Plant, Cell and Environment* **31**, 1864–1881.
- Xie YJ, Xu S, Han B, Wu MZ, Yuan XX, Han Y, Gu Q, Xu DK, Yang Q, Shen WB.** 2011. Evidence of Arabidopsis salt acclimation induced by up-regulation of *HY1* and the regulatory role of RbohD-derived reactive oxygen species synthesis. *The Plant Journal* **66**, 280–292.
- Xuan W, Xu S, Li M, Han B, Zhang B, Zhang J, Lin Y, Huang J, Shen W, Cui J.** 2012. Nitric oxide is involved in hemin-induced cucumber adventitious rooting process. *Journal of Plant Physiology* **169**, 1032–1039.
- Zhao MG, Tian QY, Zhang WH.** 2007. Nitric oxide synthase-dependent nitric oxide production is associated with salt tolerance in Arabidopsis. *Plant Physiology* **144**, 206–217.
